# Supplementary material for: Quantitative Proteomic Analysis of Plasma after Remote Ischemic Conditioning in a Rhesus Monkey Ischemic Stroke Model
Source: MDPI journal article supplement (doi:10.3390/biom11081164), 2021-08-06
Supplement: s1 [file s1]

**Table S1 Differentially expressed proteins in response to the RIC stimulus demonstrating up regulation and down regulation at one week post-RIC.**

| Up regulation (n = 3)                | Down regulation (n = 2)            |
|--------------------------------------|------------------------------------|
| Apolipoprotein A-II                  | Gamma-glutamyl hydrolase precursor |
| Collectin-10                         | Protein HEG homolog 1              |
| Mannose-binding protein C isoform X2 |                                    |

**Table S2 Differentially expressed proteins in response to the RIC stimulus demonstrating up regulation and down regulation at two weeks post-RIC.**

| Up regulation (n = 1)               | Down regulation (n = 4)                               |
|-------------------------------------|-------------------------------------------------------|
| Glucose-regulated protein precursor | Putative serpin A13                                   |
|                                     | Protein-lysine 6-oxidase                              |
|                                     | Dermcidin                                             |
|                                     | Phosphatidylcholine-sterol acyltransferase isoform X2 |

**Table S3. Differentially expressed proteins in response to the RIC stimulus up demonstrating regulation and down regulation at three weeks post-RIC.**

| <b>Up regulation (n = 9)</b>              | <b>Down regulation (n = 6)</b>                                                  |
|-------------------------------------------|---------------------------------------------------------------------------------|
| Alpha-2-macroglobulin isoform X2          | Complement factor H-related protein 2 isoform X2                                |
| Complement C3                             | Voltage-dependent calcium channel subunit alpha-2/delta-1 isoform X7            |
| Histone cluster 1, H2aj                   | Insulin-like growth factor I isoform X3                                         |
| Procollagen C-endopeptidase enhancer 1PP  | Multiple epidermal growth factor-like domains protein 8 isoform X2              |
| T-complex protein 1 subunit gamma         | Basement membrane-specific heparan sulfate proteoglycan core protein isoform X2 |
| C4b-binding protein beta chain isoform X2 | Putative serpin A13                                                             |
| Platelet glycoprotein Ib alpha chain      |                                                                                 |
| Tubulin beta-4B chain isoform X1          |                                                                                 |
| Histone H3.1t-like                        |                                                                                 |

**Table S4. Differentially expressed proteins in response to the RIC stimulus up demonstrating regulation and down regulation at four weeks post-RIC.**

| <b>Up regulation (n = 9)</b>                                                    | <b>Down regulation (n = 2)</b> |
|---------------------------------------------------------------------------------|--------------------------------|
| Factor IX precursor                                                             | Gelsolin isoform X4            |
| Serum amyloid A-4 protein isoform X2                                            | Fibrinogen alpha chain         |
| Apolipoprotein A-II                                                             |                                |
| N-sulphoglucosamine sulphohydrolase isoform X1                                  |                                |
| Complement C1s subcomponent                                                     |                                |
| Complement C3                                                                   |                                |
| Alpha-2-macroglobulin isoform X2                                                |                                |
| Basement membrane-specific heparan sulfate proteoglycan core protein isoform X2 |                                |
| Apolipoprotein C-II isoform X1                                                  |                                |

**Table S5. Differentially expressed proteins in response to the RIC stimulus up demonstrating regulation and down regulation at five weeks post-RIC.**

| <b>Up regulation (n = 6)</b>                                    | <b>Down regulation (n = 8)</b>                                       |
|-----------------------------------------------------------------|----------------------------------------------------------------------|
| Leukocyte elastase inhibitor isoform X1                         | Phosphatidylcholine-sterol acyltransferase isoform X2                |
| Histone cluster 1, H2aj                                         | Multiple epidermal growth factor-like domains protein 8 isoform X2   |
| Cell surface glycoprotein MUC18                                 | Complement factor H-related protein 2 isoform X2                     |
| Tubulin beta-4B chain isoform X1                                | Putative serpin A13                                                  |
| Histone H3.1t-like                                              | Voltage-dependent calcium channel subunit alpha-2/delta-1 isoform X7 |
| Microtubule-associated protein RP/EB family member 2 isoform X4 | L-lactate dehydrogenase B chain isoform LDHB                         |
|                                                                 | Insulin-like growth factor I isoform X3                              |
|                                                                 | Prostaglandin-H2 D-isomerase precursor                               |

**Table S6. GO analysis of differentially expressed proteins between baseline and post-one-week RIC samples.**

| GO<br>classification 1 | GO<br>classification 2                     | Up | Down |
|------------------------|--------------------------------------------|----|------|
| Total protein          |                                            | 8  | 5    |
| Biological<br>Process  | Positive regulation of biological process  | 2  | 1    |
|                        | Immune system process                      | 1  | 0    |
|                        | Signaling                                  | 1  | 2    |
|                        | Locomotion                                 | 0  | 1    |
|                        | <b>Metabolic process</b>                   | 3  | 1    |
|                        | <b>Biological regulation</b>               | 3  | 3    |
|                        | Interspecies interaction between organisms | 1  | 0    |
|                        | <b>Cellular process</b>                    | 4  | 3    |
|                        | Developmental process                      | 1  | 2    |
|                        | Localization                               | 2  | 2    |
|                        | Response to stimulus                       | 1  | 2    |
|                        | Multicellular organismal process           | 1  | 3    |
|                        | Negative regulation of biological process  | 1  | 2    |
| Cellular<br>Component  | Intracellular                              | 4  | 2    |
|                        | <b>Cellular anatomical entity</b>          | 8  | 4    |
|                        | Protein-containing complex                 | 4  | 1    |
| Molecular<br>Function  | <b>Binding</b>                             | 7  | 3    |
|                        | Molecular function regulator               | 3  | 2    |
|                        | Catalytic activity                         | 1  | 0    |

**Table S7. GO analysis of differentially expressed proteins between baseline and post-two-week RIC samples.**

| GO<br>classification 1 | GO<br>classification 2                        | Up       | Down     |
|------------------------|-----------------------------------------------|----------|----------|
| Total protein          |                                               | 1        | 4        |
| Biological<br>Process  | Developmental process                         | 1        | 0        |
|                        | Multicellular organismal process              | 1        | 0        |
|                        | Regulation of biological process              | 1        | 1        |
|                        | Response to stimulus                          | 1        | 0        |
|                        | Biological regulation                         | 1        | 1        |
|                        | <b>Cellular process</b>                       | <b>1</b> | <b>2</b> |
|                        | Signaling                                     | 1        | 0        |
|                        | Interspecies interaction between<br>Organisms | 0        | 1        |
|                        | <b>Metabolic process</b>                      | <b>1</b> | <b>2</b> |
|                        | Positive regulation of biological process     | 1        | 0        |
|                        | Localization                                  | 1        | 0        |
|                        | Locomotion                                    | 1        | 0        |
|                        | Negative regulation of biological process     | 1        | 1        |
|                        | <b>Cellular anatomical entity</b>             | <b>1</b> | <b>2</b> |
| Cellular<br>Component  | Intracellular                                 | 1        | 0        |
|                        | Protein-containing complex                    | 1        | 0        |
| Molecular<br>Function  | Binding                                       | 1        | 1        |
|                        | Molecular function regulator                  | 0        | 1        |
|                        | <b>Catalytic activity</b>                     | <b>1</b> | <b>3</b> |

**Table S8. GO analysis of differentially expressed proteins between baseline and post-three-week RIC samples.**

| <b>GO<br/>classification 1</b> | <b>GO<br/>classification 2</b>            | <b>Up</b> | <b>Down</b> |
|--------------------------------|-------------------------------------------|-----------|-------------|
| Total protein                  |                                           | 8         | 5           |
| Biological<br>Process          | Positive regulation of biological process | 2         | 1           |
|                                | Immune system process                     | 1         | 0           |
|                                | Signaling                                 | 1         | 2           |
|                                | locomotion                                | 0         | 1           |
|                                | <b>Metabolic process</b>                  | <b>3</b>  | <b>1</b>    |
|                                | <b>Biological regulation</b>              | <b>3</b>  | <b>3</b>    |
|                                | Interspecies interaction between          |           |             |
|                                | Organisms                                 | 1         | 0           |
|                                | <b>Cellular process</b>                   | <b>4</b>  | <b>3</b>    |
|                                | Developmental process                     | 1         | 2           |
|                                | Localization                              | 2         | 2           |
|                                | Response to stimulus                      | 1         | 2           |
|                                | Multicellular organismal process          | 1         | 3           |
|                                | Negative regulation of biological process | 1         | 2           |
| Cellular<br>Component          | Intracellular                             | 4         | 2           |
|                                | <b>Cellular anatomical entity</b>         | <b>8</b>  | <b>4</b>    |
|                                | Protein-containing complex                | 4         | 1           |
| Molecular<br>Function          | <b>Binding</b>                            | <b>7</b>  | <b>3</b>    |
|                                | Molecular function regulator              | 3         | 2           |
|                                | Catalytic activity                        | 1         | 0           |



**Table S9. GO analysis of differentially expressed proteins between baseline and post-four-week RIC samples.**

| GO<br>classification<br>1 | GO<br>classification 2                           | Up       | Down     |
|---------------------------|--------------------------------------------------|----------|----------|
| Total protein             |                                                  | 10       | 2        |
| Biological<br>Process     | Developmental process                            | 2        | 0        |
|                           | Signaling                                        | 1        | 1        |
|                           | <b>Cellular process</b>                          | <b>4</b> | <b>2</b> |
|                           | Locomotion                                       | 1        | 0        |
|                           | <b>Immune system process</b>                     | <b>4</b> | <b>1</b> |
|                           | <b>Response to stimulus</b>                      | <b>6</b> | <b>1</b> |
|                           | <b>Positive regulation of biological process</b> | <b>4</b> | <b>2</b> |
|                           | Biological adhesion                              | 0        | 1        |
|                           | <b>Localization</b>                              | <b>4</b> | <b>1</b> |
|                           | <b>Biological regulation</b>                     | <b>5</b> | <b>2</b> |
|                           | <b>Metabolic process</b>                         | <b>5</b> | <b>1</b> |
|                           | Negative regulation of biological process        | 1        | 2        |
|                           | Interspecies interaction between organisms       | 1        | 1        |
|                           | <b>Multicellular organismal process</b>          | <b>4</b> | <b>1</b> |
| Cellular<br>Component     | Protein-containing complex                       | 4        | 1        |
|                           | Intracellular                                    | 1        | 1        |
|                           | <b>Cellular anatomical entity</b>                | <b>9</b> | <b>1</b> |
| Molecular<br>Function     | <b>Binding</b>                                   | <b>9</b> | <b>2</b> |
|                           | Catalytic activity                               | 4        | 0        |
|                           | Molecular function regulator                     | 5        | 0        |

**Table S10. GO analysis of differentially expressed proteins between baseline and post-five-week RIC samples.**

| GO<br>classification 1 | GO<br>classification 2                    | Up       | Down     |
|------------------------|-------------------------------------------|----------|----------|
| Total protein          |                                           | 6        | 7        |
| Biological<br>Process  | Positive regulation of biological process | 1        | 1        |
|                        | Metabolic process                         | 1        | 4        |
|                        | Locomotion                                | 1        | 1        |
|                        | Multicellular organismal process          | 1        | 3        |
|                        | <b>Cellular process</b>                   | <b>3</b> | <b>5</b> |
|                        | Localization                              | 1        | 2        |
|                        | <b>Regulation of biological process</b>   | <b>2</b> | <b>4</b> |
|                        | <b>Biological regulation</b>              | <b>2</b> | <b>4</b> |
|                        | Negative regulation of biological process | 1        | 3        |
|                        | Developmental process                     | 0        | 1        |
|                        | Signaling                                 | 1        | 2        |
|                        | Response to stimulus                      | 1        | 2        |
| Cellular<br>Component  | Protein-containing complex                | 2        | 1        |
|                        | Intracellular                             | 4        | 4        |
|                        | <b>Cellular anatomical entity</b>         | <b>6</b> | <b>6</b> |
| Molecular<br>Function  | Molecular function regulator              | 1        | 2        |
|                        | <b>Binding</b>                            | <b>4</b> | <b>3</b> |
|                        | Catalytic activity                        | 1        | 3        |

**Table S11. KOG analysis of differentially expressed proteins between baseline and post-one-week RIC samples.**

| <b>Protein name</b> | <b>KOG id</b> | <b>KOG class definition</b> | <b>Functional categories</b> | <b>Function class definition</b>  |
|---------------------|---------------|-----------------------------|------------------------------|-----------------------------------|
| Hs4503987           | KOG1559       | Gamma-glutamyl hydrolase    | METABOLISM                   | Coenzyme transport and metabolism |
| Hs5453619           | KOG4297       | C-type lectin               | --                           | --                                |

**Table S12. KOG analysis of differentially expressed proteins between baseline and post-two-week RIC samples.**

| <b>Protein name</b> | <b>KOG id</b> | <b>KOG class definition</b>                                                   | <b>Functional categories</b>                                                           | <b>Function class definition</b>                                      |
|---------------------|---------------|-------------------------------------------------------------------------------|----------------------------------------------------------------------------------------|-----------------------------------------------------------------------|
| Hs16507237          | KOG0100       | Molecular chaperones<br>GRP78/BiP/KAR2,<br>HSP70 superfamily                  | CELLULAR<br>PROCESSES<br>AND<br>SIGNALING<br>CELLULAR<br>PROCESSES<br>AND<br>SIGNALING | Posttranslational<br>modification,<br>protein turnover,<br>chaperones |
| Hs17453738          | KOG2392       | Serpin                                                                        |                                                                                        | Defense<br>mechanisms                                                 |
| Hs4557892           | KOG2369       | Lecithin: cholesterol<br>acyltransferase<br>(LCAT)/Acyl-<br>ceramide synthase | METABOLISM                                                                             | Lipid transport<br>and metabolism                                     |

**Table S13. KOG analysis of differentially expressed proteins between baseline and post-three-week RIC samples.**

| <b>Protein name</b> | <b>KOG id</b> | <b>KOG class definition</b>                                                 | <b>Functional categories</b>       | <b>Function class definition</b>                             |
|---------------------|---------------|-----------------------------------------------------------------------------|------------------------------------|--------------------------------------------------------------|
| Hs4557225           | KOG1366       | Alpha-macroglobulin                                                         | CELLULAR PROCESSES AND SIGNALING   | Posttranslational modification, protein turnover, chaperones |
| Hs10800144          | KOG1756       | Histone 2A                                                                  | INFORMATION STORAGE AND PROCESSING | Chromatin structure and dynamics                             |
| Hs7427517           | KOG3509       | Basement membrane-specific heparan sulfate proteoglycan (HSPG) core protein | CELLULAR PROCESSES AND SIGNALING   | Posttranslational modification, protein turnover, chaperones |
| Hs20539011          | KOG0364       | Chaperonin complex component, TCP-1 gamma subunit (CCT3)                    | CELLULAR PROCESSES AND SIGNALING   | Posttranslational modification, protein turnover, chaperones |
| Hs4502505           | KOG4297       | C-type lectin                                                               | --                                 | --                                                           |
| Hs4757894           | KOG2353       | L-type voltage-dependent Ca <sup>2+</sup> channel, alpha2/delta subunit     | --                                 | --                                                           |
| Hs4504281           | KOG1745       | Histones H3 and H4                                                          | INFORMATION STORAGE AND PROCESSING | Chromatin structure and dynamics                             |
| Hs17453738          | KOG2392       | Serpin                                                                      | CELLULAR PROCESSES AND SIGNALING   | Defense mechanisms                                           |
| Hs5174735           | KOG1375       | Beta tubulin                                                                | CELLULAR PROCESSES AND SIGNALING   | Cytoskeleton                                                 |
| Hs4504071           | KOG0619       | FOG: Leucine rich repeat                                                    | POORLY CHARACTERIZED               | General function prediction only                             |
| Hs20544382          | KOG1388       | Attractin and platelet-activating factor acetylhydrolase                    | --                                 | --                                                           |

**Table S14. KOG analysis of differentially expressed proteins between baseline and post-four-week RIC samples.**

| <b>Protein name</b> | <b>KOG id</b> | <b>KOG class definition</b>                                                 | <b>Functional categories</b>     | <b>Function class definition</b>                             |
|---------------------|---------------|-----------------------------------------------------------------------------|----------------------------------|--------------------------------------------------------------|
| Hs4557225           | KOG1366       | Alpha-macroglobulin                                                         | CELLULAR PROCESSES AND SIGNALING | Posttranslational modification, protein turnover, chaperones |
| Hs7427517           | KOG3509       | Basement membrane-specific heparan sulfate proteoglycan (HSPG) core protein | CELLULAR PROCESSES AND SIGNALING | Posttranslational modification, protein turnover, chaperones |
| Hs4502495           | KOG3627       | Trypsin                                                                     | METABOLISM                       | Amino acid transport and metabolism                          |
| Hs4504165           | KOG0443       | Actin regulatory proteins (gelsolin/villin family)                          | CELLULAR PROCESSES AND SIGNALING | Cytoskeleton                                                 |
| Hs4506919           | KOG3867       | Sulfatase                                                                   | POORLY CHARACTERIZED             | General function prediction only                             |

**Table S15. KOG analysis of differentially expressed proteins between baseline and post-five-week RIC samples.**

| <b>Protein name</b> | <b>KOG id</b> | <b>KOG class definition</b>                                             | <b>Functional categories</b>       | <b>Function class definition</b> |
|---------------------|---------------|-------------------------------------------------------------------------|------------------------------------|----------------------------------|
| Hs10800144          | KOG1756       | Histone 2A                                                              | INFORMATION STORAGE AND PROCESSING | Chromatin structure and dynamics |
| Hs4757894           | KOG2353       | L-type voltage-dependent Ca <sup>2+</sup> channel, alpha2/delta subunit | --                                 | --                               |
| Hs13489087          | KOG2392       | Serpin                                                                  | CELLULAR PROCESSES AND SIGNALING   | Defense mechanisms               |
| Hs4504281           | KOG1745       | Histones H3 and H4                                                      | INFORMATION STORAGE AND PROCESSING | Chromatin structure and dynamics |
| Hs5174735           | KOG1375       | Beta tubulin                                                            | CELLULAR PROCESSES AND SIGNALING   | Cytoskeleton                     |
| Hs10346135          | KOG3000       | Microtubule-binding protein involved in cell cycle control              | --                                 | --                               |
| Hs20544382          | KOG1388       | Attractin and platelet-activating factor acetylhydrolase                | --                                 | --                               |
| Hs4557892           | KOG2369       | Lecithin:cholesterol acyltransferase (LCAT)/Acyl-ceramide synthase      | METABOLISM                         | Lipid transport and metabolism   |
| Hs4557032           | KOG1495       | Lactate dehydrogenase                                                   | METABOLISM                         | Energy production and conversion |

**Table S16. KEGG analysis of the top 40 differentially enriched pathway between baseline and post-one-week RIC samples.**

| #Pathway name                       | Pathway ID |
|-------------------------------------|------------|
| Antifolate resistance               | mcc01523   |
| Folate biosynthesis                 | mcc00790   |
| PPAR signaling pathway              | mcc03320   |
| Cholesterol metabolism              | mcc04979   |
| Staphylococcus aureus infection     | mcc05150   |
| Phagosome                           | mcc04145   |
| Complement and coagulation cascades | mcc04610   |



**Table S17. KEGG analysis of the top 40 differentially enriched pathway between baseline and post-two-week RIC samples.**

| #Pathway name                               | Pathway ID |
|---------------------------------------------|------------|
| Glycerophospholipid metabolism              | mcc00564   |
| Protein export                              | mcc03060   |
| Thyroid hormone synthesis                   | mcc04918   |
| Prion diseases                              | mcc05020   |
| Cholesterol metabolism                      | mcc04979   |
| Protein processing in endoplasmic reticulum | mcc04141   |

**Table S18. KEGG analysis of the top 40 differentially enriched pathway between baseline and post-three-week RIC samples.**

| #Pathway name                                            | Pathway ID |
|----------------------------------------------------------|------------|
| Alcoholism                                               | mcc05034   |
| Systemic lupus erythematosus                             | mcc05322   |
| Transcriptional misregulation in cancer                  | mcc05202   |
| Long-term depression                                     | mcc04730   |
| Ovarian steroidogenesis                                  | mcc04913   |
| Dilated cardiomyopathy (DCM)                             | mcc05414   |
| Aldosterone-regulated sodium reabsorption                | mcc04960   |
| Progesterone-mediated oocyte maturation                  | mcc04914   |
| Hypertrophic cardiomyopathy (HCM)                        | mcc05410   |
| MAPK signaling pathway                                   | mcc04010   |
| Pertussis                                                | mcc05133   |
| Signaling pathways regulating pluripotency of stem cells | mcc04550   |
| mTOR signaling pathway                                   | mcc04150   |
| Breast cancer                                            | mcc05224   |
| FoxO signaling pathway                                   | mcc04068   |
| Leishmaniasis                                            | mcc05140   |
| Longevity regulating pathway                             | mcc04211   |
| Proteoglycans in cancer                                  | mcc05205   |
| ECM-receptor interaction                                 | mcc04512   |
| EGFR tyrosine kinase inhibitor resistance                | mcc01521   |
| Glioma                                                   | mcc05214   |
| Melanoma                                                 | mcc05218   |
| p53 signaling pathway                                    | mcc04115   |
| Complement and coagulation cascades                      | mcc04610   |
| Endocrine resistance                                     | mcc01522   |
| Inflammatory mediator regulation of TRP channels         | mcc04750   |
| AMPK signaling pathway                                   | mcc04152   |
| Longevity regulating pathway - multiple species          | mcc04213   |
| Phagosome                                                | mcc04145   |
| Gap junction                                             | mcc04540   |
| Prostate cancer                                          | mcc05215   |
| Arrhythmogenic right ventricular cardiomyopathy (ARVC)   | mcc05412   |
| Cardiac muscle contraction                               | mcc04260   |
| Chagas disease (American trypanosomiasis)                | mcc05142   |
| Neuroactive ligand-receptor interaction                  | mcc04080   |
| Oocyte meiosis                                           | mcc04114   |
| Oxytocin signaling pathway                               | mcc04921   |
| Ras signaling pathway                                    | mcc04014   |
| Hepatitis B                                              | mcc05161   |
| Necroptosis                                              | mcc04217   |

**Table S19. KEGG analysis of the top 40 differentially enriched pathway between baseline and post-four-week RIC samples.**

| #Pathway name                                   | Pathway ID |
|-------------------------------------------------|------------|
| Complement and coagulation cascades             | mcc04610   |
| Pertussis                                       | mcc05133   |
| Systemic lupus erythematosus                    | mcc05322   |
| Staphylococcus aureus infection                 | mcc05150   |
| Cholesterol metabolism                          | mcc04979   |
| Fc gamma R-mediated phagocytosis                | mcc04666   |
| Leishmaniasis                                   | mcc05140   |
| Viral carcinogenesis                            | mcc05203   |
| Glycosaminoglycan degradation                   | mcc00531   |
| PPAR signaling pathway                          | mcc03320   |
| Chagas disease (American trypanosomiasis)       | mcc05142   |
| Neuroactive ligand-receptor interaction         | mcc04080   |
| Hepatitis B                                     | mcc05161   |
| Kaposi sarcoma-associated herpesvirus infection | mcc05167   |
| Legionellosis                                   | mcc05134   |
| Herpes simplex virus 1 infection                | mcc05168   |
| Lysosome                                        | mcc04142   |
| Tuberculosis                                    | mcc05152   |
| Regulation of actin cytoskeleton                | mcc04810   |
| Platelet activation                             | mcc04611   |
| Proteoglycans in cancer                         | mcc05205   |
| ECM-receptor interaction                        | mcc04512   |
| Phagosome                                       | mcc04145   |
| Metabolic pathways                              | mcc01100   |

**Table S20. KEGG analysis of the top 40 differentially enriched pathway between baseline and post-five-week RIC samples.**

| #Pathway Name                                            | Pathway ID |
|----------------------------------------------------------|------------|
| Alcoholism                                               | mcc05034   |
| Transcriptional misregulation in cancer                  | mcc05202   |
| Long-term depression                                     | mcc04730   |
| Ovarian steroidogenesis                                  | mcc04913   |
| Dilated cardiomyopathy (DCM)                             | mcc05414   |
| HIF-1 signaling pathway                                  | mcc04066   |
| Hypertrophic cardiomyopathy (HCM)                        | mcc05410   |
| MAPK signaling pathway                                   | mcc04010   |
| Aldosterone-regulated sodium reabsorption                | mcc04960   |
| Glycerophospholipid metabolism                           | mcc00564   |
| Progesterone-mediated oocyte maturation                  | mcc04914   |
| Signaling pathways regulating pluripotency of stem cells | mcc04550   |
| mTOR signaling pathway                                   | mcc04150   |
| Systemic lupus erythematosus                             | mcc05322   |
| Arachidonic acid metabolism                              | mcc00590   |
| Breast cancer                                            | mcc05224   |
| FoxO signaling pathway                                   | mcc04068   |
| Longevity regulating pathway                             | mcc04211   |
| EGFR tyrosine kinase inhibitor resistance                | mcc01521   |
| Glioma                                                   | mcc05214   |
| Melanoma                                                 | mcc05218   |
| p53 signaling pathway                                    | mcc04115   |
| Cysteine and methionine metabolism                       | mcc00270   |
| Endocrine resistance                                     | mcc01522   |
| Inflammatory mediator regulation of TRP channels         | mcc04750   |
| Propanoate metabolism                                    | mcc00640   |
| AMPK signaling pathway                                   | mcc04152   |
| Longevity regulating pathway - multiple species          | mcc04213   |
| Gap junction                                             | mcc04540   |
| Prostate cancer                                          | mcc05215   |
| Arrhythmogenic right ventricular cardiomyopathy (A C)    | mcc05412   |
| Cardiac muscle contraction                               | mcc04260   |
| Oocyte meiosis                                           | mcc04114   |
| Oxytocin signaling pathway                               | mcc04921   |
| Pyruvate metabolism                                      | mcc00620   |
| Ras signaling pathway                                    | mcc04014   |
| Glucagon signaling pathway                               | mcc04922   |
| Necroptosis                                              | mcc04217   |
| Adrenergic signaling in cardiomyocytes                   | mcc04261   |
| Central carbon metabolism in cancer                      | mcc05230   |
